# Supplementary material for: Detection and Monitoring of Riverine Dragonfly of Community Interest (Insecta: Odonata): Proposal for a Standardised Protocol Based on Exuviae Collection
Source: MDPI journal article supplement (doi:10.3390/d14090728), 2022-09-02
Supplement: s1 [file s1]

## **Supplementary material**

# **Detection and monitoring of riverine dragonfly of community interest (Insecta: Odonata): proposal for a standardised protocol based on exuviae collection**

**Journal : *Diversity***

**Loan Arguel<sup>1</sup>, Alice S. Denis<sup>1,2</sup>, Samuel Danflous<sup>2</sup>, Nicolas Gouix<sup>2</sup>, Frédéric Santoul<sup>1</sup>, Laëtitia Buisson<sup>1</sup> and Laurent Pelozuelo<sup>1\*</sup>**

<sup>1</sup> Laboratoire d'Ecologie fonctionnelle et Environnement. CNRS – INPT - UPS. Université Paul Sabatier, Bâtiment 4R1. 118 Route de Narbonne, 31062 Toulouse Cedex 09. France.

<sup>2</sup> Conservatoire d'Espaces Naturels d'Occitanie. BP 57611. 75 Voie du TOEC. 31 076 Toulouse Cedex 3. France.

\* Correspondence: laurent.pelozuelo@univ-tlse3.fr

**Table S1.** Location and sampling dates of the ninety-eight transects. GPS points are provided in WGS84 geographic format.

|        |           | Upstream transect coordinates |           | Downstream transect coordinates |           | 1rst<br>sampling | 2nd<br>sampling | 3rd<br>sampling |
|--------|-----------|-------------------------------|-----------|---------------------------------|-----------|------------------|-----------------|-----------------|
| Rivers | Transects | X                             | Y         | X                               | Y         |                  |                 |                 |
| Lot    | 1         | 1,852288                      | 44,484364 | 1,851262                        | 44,483985 | 10/07/2015       | 31/07/2015      | 20/08/2015      |
|        | 2         | 1,82356                       | 44,4767   | 1,82239                         | 44,47643  | 08/07/2015       | 30/07/2015      | 20/08/2015      |
|        | 3         | 1,801197                      | 44,47885  | 1,799676                        | 44,480023 | 08/07/2015       | 30/07/2015      | 20/08/2015      |
|        | 4         | 1,843621                      | 44,463459 | 1,842547                        | 44,463129 | 08/07/2015       | 31/07/2015      | 20/08/2015      |
|        | 5         | 2,885247                      | 44,501829 | 2,884543                        | 44,502527 | 14/07/2015       | 06/08/2015      | 26/08/2015      |
|        | 6         | 2,865387                      | 44,507594 | 2,86484                         | 44,508298 | 10/07/2015       | 06/08/2015      | 26/08/2015      |
|        | 7         | 2,820838                      | 44,510007 | 2,820008                        | 44,51077  | 14/07/2015       | 06/08/2015      | 24/08/2015      |
|        | 8         | 2,9323                        | 44,470868 | 2,931227                        | 44,471036 | 14/07/2015       | 06/08/2015      | 26/08/2015      |
|        | 9         | 2,65134                       | 44,56942  | 2,65033                         | 44,56997  | 10/07/2015       | 05/08/2015      | 25/08/2015      |
|        | 10        | 2,6017                        | 44,60645  | 2,60127                         | 44,60728  | 10/07/2015       | 05/08/2015      | 25/08/2015      |
|        | 11        | 2,676146                      | 44,551174 | 2,675272                        | 44,551869 | 13/07/2015       | 07/08/2015      | 25/08/2015      |
|        | 12        | 2,66549                       | 44,55066  | 2,66516                         | 44,55161  | 10/07/2015       | 05/08/2015      | 25/08/2015      |
|        | 13        | 2,61215                       | 44,603046 | 2,613047                        | 44,603327 | 13/07/2015       | 05/08/2015      | 25/08/2015      |
|        | 14        | 1,289381                      | 44,490182 | 1,288303                        | 44,489372 | 09/07/2015       | 29/07/2015      | 20/08/2015      |
|        | 15        | 1,281145                      | 44,482519 | 1,279864                        | 44,483471 | 07/07/2015       | 29/07/2015      | 19/08/2015      |
|        | 16        | 1,353503                      | 44,48435  | 1,352507                        | 44,48471  | 09/07/2015       | 30/07/2015      | 20/08/2015      |
|        | 17        | 1,307622                      | 44,491516 | 1,306759                        | 44,490784 | 09/07/2015       | 29/07/2015      | 19/08/2015      |
|        | 18        | 1,296572                      | 44,468971 | 1,296557                        | 44,467995 | 07/07/2015       | 29/07/2015      | 19/08/2015      |
|        | 19        | 0,733736                      | 44,403794 | 0,732304                        | 44,403224 | 06/07/2015       | 28/07/2015      | 19/08/2015      |
|        | 20        | 0,711226                      | 44,401052 | 0,710608                        | 44,401448 | 06/07/2015       | 28/07/2015      | 17/08/2015      |
|        | 21        | 0,849887                      | 44,423401 | 0,849011                        | 44,422849 | 07/07/2015       | 28/07/2015      | 19/08/2015      |
|        | 22        | 0,775257                      | 44,394343 | 0,774528                        | 44,394944 | 06/07/2015       | 28/07/2015      | 19/08/2015      |
| Tarn   | 1         | 2,38385                       | 43,94225  | 2,38287                         | 43,94178  | 17/06/2015       | 17/07/2015      | 28/07/2015      |
|        | 2         | 2,37612                       | 43,94428  | 2,37498                         | 43,94393  | 17/06/2015       | 17/07/2015      | 29/07/2015      |
|        | 3         | 2,40003                       | 43,93348  | 2,39905                         | 43,93287  | 17/06/2015       | 18/07/2015      | 29/07/2015      |

|                           |    |          |           |          |           |            |            |            |
|---------------------------|----|----------|-----------|----------|-----------|------------|------------|------------|
|                           | 4  | 2,37656  | 43,94962  | 2,37708  | 43,94888  | 17/06/2015 | 17/07/2015 | 29/07/2015 |
|                           | 5  | 2,2451   | 43,93732  | 2,24453  | 43,93818  | 29/06/2015 | 16/07/2015 | 28/07/2015 |
|                           | 6  | 2,23228  | 43,95035  | 2,23122  | 43,95063  | 30/06/2015 | 16/07/2015 | 28/07/2015 |
|                           | 7  | 2,2895   | 43,93547  | 2,28942  | 43,93427  | 29/06/2015 | 16/07/2015 | 28/07/2015 |
|                           | 8  | 2,627632 | 43,992139 | 2,627608 | 43,993039 | 09/06/2015 | 20/07/2015 | 11/08/2015 |
|                           | 9  | 2,62236  | 43,99709  | 2,62153  | 43,99774  | 18/06/2015 | 20/07/2015 | 11/08/2015 |
|                           | 10 | 2,66798  | 43,99088  | 2,6687   | 43,98895  | 18/06/2015 | 21/07/2015 | 11/08/2015 |
|                           | 11 | 2,5309   | 43,9868   | 2,53073  | 43,98498  | 09/06/2015 | 21/07/2015 | 11/08/2015 |
|                           | 12 | 2,52345  | 43,97358  | 2,52368  | 43,97257  | 19/06/2015 | 21/07/2015 | 12/08/2015 |
|                           | 13 | 2,60948  | 44,0072   | 2,60877  | 44,00783  | 19/06/2015 | 20/07/2015 | 12/08/2015 |
|                           | 14 | 2,55877  | 43,99505  | 2,55765  | 43,9954   | 19/06/2015 | 21/07/2015 | 12/08/2015 |
|                           | 15 | 2,7336   | 44,03665  | 2,73253  | 44,03595  | 23/06/2015 | 24/07/2015 | 10/08/2015 |
|                           | 16 | 2,71378  | 44,01378  | 2,71398  | 44,01303  | 23/06/2015 | 24/07/2015 | 11/08/2015 |
|                           | 17 | 2,748    | 44,0459   | 2,74702  | 44,04532  | 24/06/2015 | 23/07/2015 | 10/08/2015 |
|                           | 18 | 1,81492  | 43,85663  | 1,81452  | 43,85575  | 24/06/2015 | 09/07/2015 | 27/07/2015 |
|                           | 19 | 1,81812  | 43,84123  | 1,81688  | 43,8408   | 24/06/2015 | 09/07/2015 | 27/07/2015 |
|                           | 20 | 1,83718  | 43,86883  | 1,83598  | 43,86878  | 30/06/2015 | 15/07/2015 | 28/07/2015 |
|                           | 21 | 2,81802  | 44,06812  | 2,81902  | 44,06815  | 18/06/2015 | 23/07/2015 | 10/08/2015 |
|                           | 22 | 2,9121   | 44,07352  | 2,9132   | 44,074    | 18/06/2015 | 23/07/2015 | 10/08/2015 |
|                           | 23 | 2,89447  | 44,05185  | 2,89243  | 44,05222  | 18/06/2015 | 23/07/2015 | 10/08/2015 |
|                           | 24 | 1,73882  | 43,82638  | 1,73797  | 43,8272   | 25/06/2015 | 15/07/2015 | 27/07/2015 |
|                           | 25 | 1,72507  | 43,81772  | 1,7258   | 43,81717  | 25/06/2015 | 15/07/2015 | 27/07/2015 |
|                           | 26 | 1,69517  | 43,79757  | 1,69475  | 43,79685  | 26/06/2015 | 15/07/2015 | 27/07/2015 |
| <b>Dourdou de Camarès</b> | 1  | 2,70028  | 43,9857   | 2,69932  | 43,98612  | 24/06/2015 | 24/07/2015 | 11/08/2015 |

**Table S2.** Details of survey durations on the different rivers (average, standard deviation, maximum duration and minimum duration).

| Average duration of exuvia collection over 100m transects |              |          |          |          |              |          |          |          |              |          |          |          |
|-----------------------------------------------------------|--------------|----------|----------|----------|--------------|----------|----------|----------|--------------|----------|----------|----------|
|                                                           | 1st sampling |          |          |          | 2nd sampling |          |          |          | 3rd sampling |          |          |          |
|                                                           | Mean         | Sd       | Max      | Min      | Mean         | Sd       | Max      | Min      | Mean         | Sd       | Max      | Min      |
| <b>Lot (N=44)</b>                                         | 01:08:57     | 00:25:52 | 02:06:00 | 00:29:00 | 00:49:15     | 00:15:47 | 01:37:00 | 00:28:00 | 00:35:23     | 00:09:34 | 01:03:00 | 00:18:00 |
| <b>Tarn (N=52)</b>                                        | 01:12:18     | 00:25:38 | 02:11:00 | 00:30:00 | 00:53:02     | 00:14:15 | 01:23:00 | 00:28:00 | 00:34:15     | 00:11:54 | 01:07:00 | 00:14:00 |
| <b>Dourdou de Camarès (N=2)</b>                           | 01:20:30     | 00:33:14 | 01:44:00 | 00:57:00 | 00:54:00     | 00:04:15 | 00:57:00 | 00:51:00 | 00:48:30     | 00:14:51 | 00:59:00 | 00:38:00 |
